# Supplementary material
Source: PubMed Central journal article supplement (PMC3970568)
Supplement: NIHMS564825-supplement-MMC3.pdf [file NIHMS564825-supplement-MMC3.pdf]

**Table S1. Clinical and pathology data of asymptomatic autopsy cases (disease-free controls showing no evidence of gastric pathology).**

| <b>Patient ID (At-)</b> | <b>Age/<br/>Sex</b> | <b>Autopsy diagnosis</b> | <b>Date of<br/>sampling</b> |
|-------------------------|---------------------|--------------------------|-----------------------------|
| At 1                    | -/F                 | None available           | 2008/11/25                  |
| At 2                    | 83/M                | Cardiac failure          | 2008/11/27                  |
| At 5                    | 67/M                | Renal cell carcinoma     | 2009/02/20                  |
| At 6                    | 70/F                | Myocardial infarction    | 2009/03/25                  |
| At 7                    | 73/M                | Myocardial infarction    | 2009/03/25                  |
| At 8                    | 67/M                | Lung cancer              | 2009/03/31                  |

Age: (at autopsy). F, female; M, male.
