# Supplementary material
Source: PubMed Central journal article supplement (PMC3970568)
Supplement: NIHMS564825-supplement-MMC4.pdf [file NIHMS564825-supplement-MMC4.pdf]

**Table S2. Clinical and histopathologic findings of patients with intestinal-type gastric cancer**

| Patient ID (St-) | Age/<br>Sex | Site of tumor in stomach | Histology                    | TMN stage | Pre-neoplastic mucosa adjacent to cancer along LC |         |          | <i>H. pylori</i> infection |
|------------------|-------------|--------------------------|------------------------------|-----------|---------------------------------------------------|---------|----------|----------------------------|
|                  |             |                          |                              |           | IM                                                | CG      | D        |                            |
| 16               | 73/M        | antrum                   | por                          | IV        | +                                                 | -       | -        | ND <sup>1</sup>            |
| 18               | 51/M        | antrum                   | MCLI <sup>†</sup>            | II        | -                                                 | +       | -        | +                          |
| 19               | 68/M        | corpus                   | tub + por                    | IIIA      | +                                                 | +       | -        | +                          |
| 23               | 48/M        | corpus - antrum          | por                          | IV        | -                                                 | +       | -        | +                          |
| 24               | 66/M        | antrum                   | pap                          | II        | +                                                 | +       | +, focal | +                          |
| 25               | 59/F        | whole stomach            | por                          | IV        | -                                                 | +, mild | -        | -                          |
| 28               | 81/M        | fundus                   | tub + pap                    | IIIA      | +                                                 | +       | -        | ND <sup>2</sup>            |
| 30               | 83/F        | cardia - corpus          | tub                          | IIIB      | +, focal                                          | +, mild | -        | +                          |
| 31               | 38/M        | corpus - antrum          | por                          | IIIB      | +, focal                                          | +       | -        | -                          |
| 33               | 62/M        | corpus                   | tub + por                    | II        | +                                                 | +, mild | -        | ND <sup>1</sup>            |
| 34               | 66/M        | corpus                   | pap + tub                    | II        | +                                                 | -       | -        | +                          |
| 35               | 67/M        | whole stomach            | tub                          | IV        | +, focal                                          | +       | -        | +                          |
| 36               | 73/F        | cardia                   | por                          | IV        | +, focal                                          | +       | +, focal | +                          |
| 37               | 48/M        | corpus - antrum          | tub                          | IIIA      | +, focal                                          | +       | -        | +                          |
| 38               | 59/F        | antrum                   | por                          | IIIA      | +                                                 | +, mld  | -        | -                          |
| 39               | 69/M        | antrum                   | pap                          | IB        | +                                                 | -       | -        | +                          |
| 40               | 71/M        | antrum                   | por                          | IIIA      | +, focal                                          | +       | +        | +                          |
| 41               | 77/F        | antrum                   | por + pap + tub              | IB        | +, focal                                          | -       | -        | +                          |
| 42               | 77/M        | antrum                   | choriocarcinoma <sup>‡</sup> | IV        | +                                                 | +       | -        | +                          |
| 43               | 32/M        | corpus                   | por                          | IV        | +                                                 | +       | +, focal | +                          |
| 44               | 79/M        | antrum                   | tub + pap + por              | IIIA      | +                                                 | +       | +, focal | +                          |
| 45               | 60/M        | cardia                   | tub                          | II        | -                                                 | +       | -        | +                          |
| 47*              | 69/M        | antrum - corpus          | tub + pap + por              | IV        | +, focal                                          | +       | -        | +                          |
| 48               | 47/M        | corpus - antrum          | tub                          | IV        | +                                                 | +       | -        | +                          |
| 49               | 83/M        | antrum                   | tub                          | IV        | +, focal                                          | +       | -        | +                          |
| 51               | 44/M        | whole stomach            | por                          | IV        | +, focal                                          | +       | -        | +                          |
| 54               | 74/F        | antrum                   | tub                          | IIIA      | +                                                 | +       | -        | ND <sup>1</sup>            |
| 55               | 53/M        | corpus - antrum          | por                          | II        | +, focal                                          | +       | -        | ND <sup>3</sup>            |

<sup>†</sup> MCLI: medullary carcinoma with lymphocytic infiltration (Minamoto T, et al. Cancer 1990;66:945-52)

<sup>‡</sup> choriocarcinoma positive for hCG by immunohistochemistry. Abbreviations: IM, intestinal metaplasia; CG, chronic gastritis; D, dysplasia; ND<sup>1</sup>, not determined pathology slides are not available; ND<sup>2</sup>, not determined because pathology slides are not available; ND<sup>3</sup>, not determined due to poor fixation of the surgical specimen.
